# Supplementary material for: Hand grip strength and fatigability: correlation with clinical parameters and diagnostic suitability in ME/CFS
Source: PubMed Central journal article supplement (PMC8056497; doi:10.1186/s12967-021-02774-w), 2021-04-19
Supplement: 12967_2021_2774_MOESM2_ESM.pdf [file 12967_2021_2774_MOESM2_ESM.pdf]

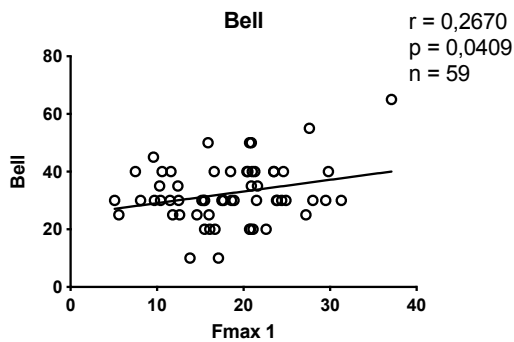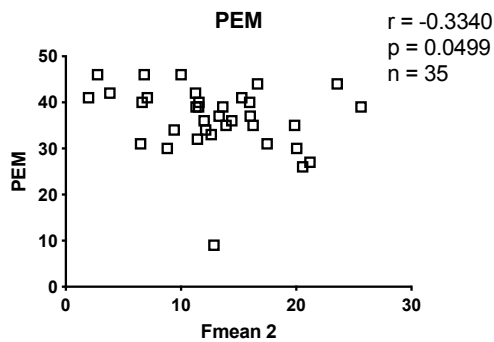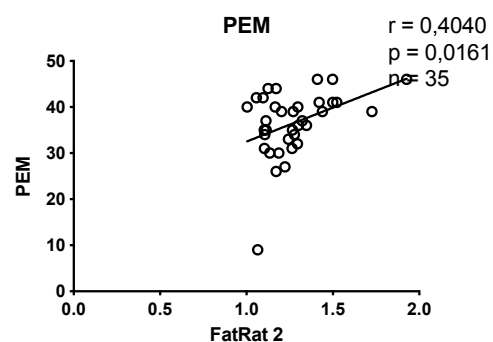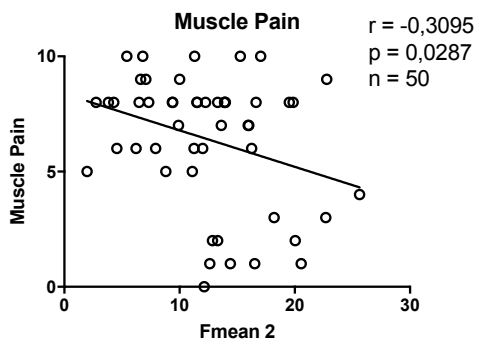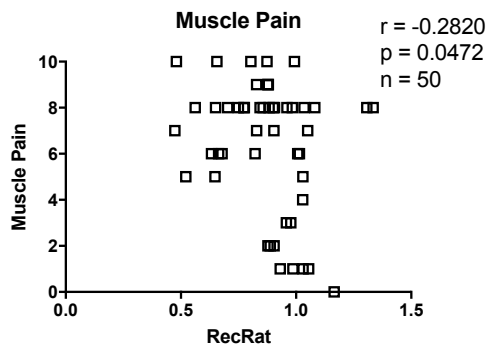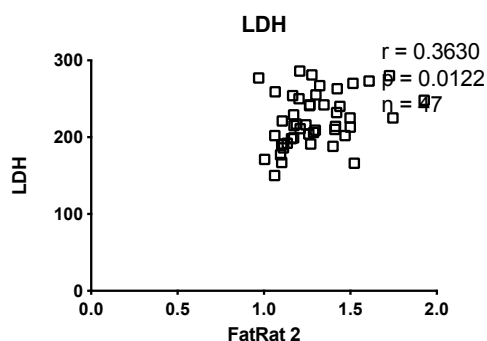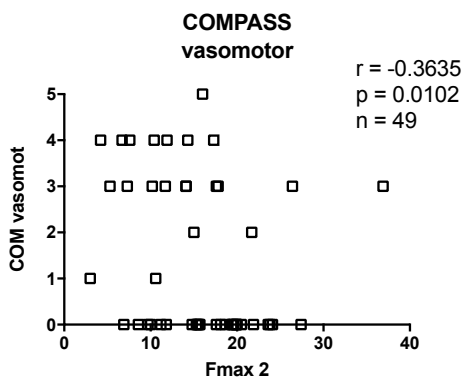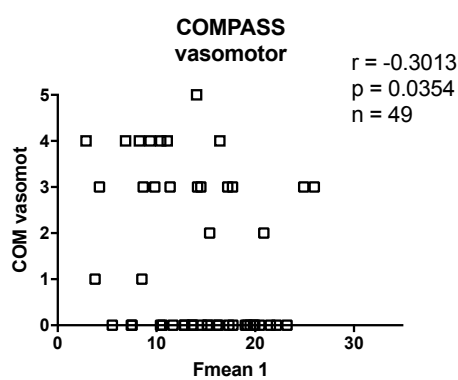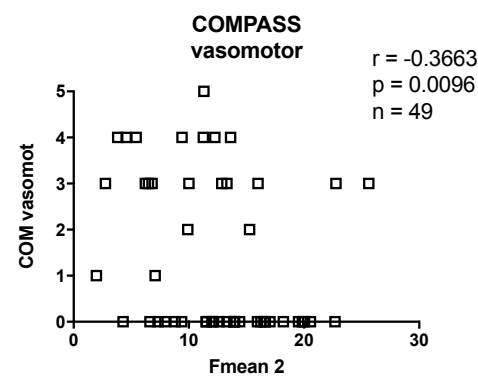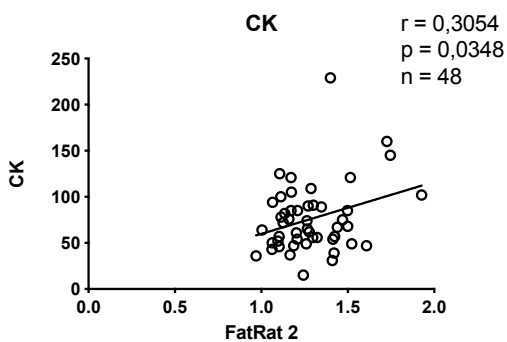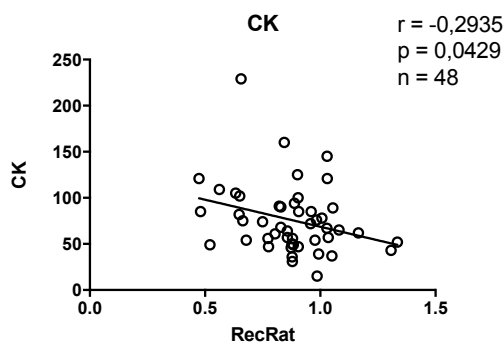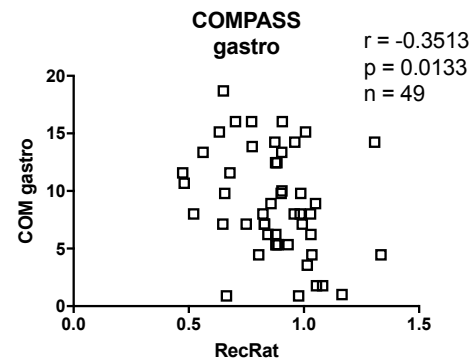

□ non-linear correlation

○ linear correlation
